# Supplementary material
Source: HighWire-hosted journal article supplement (doi:10.1101/rna.080089.124)
Supplement: Supplemental_Material.docx [file Supplemental_Material.docx]

**An MST-based assay reveals new binding preferences of IFIT1 for canonically and non-canonically capped RNAs** 

Tomasz Spiewla1,2,, Katarzyna Grab1,2, Anais Depaix3, Kamil Ziemkiewicz1,2, Marcin Warminski1,Jacek Jemielity3, Joanna Kowalska1,*

1 Division of Biophysics, Institute of Experimental Physics, Faculty of Physics, University of Warsaw, Pasteura 5, 02-093 Warsaw

2 Doctoral School of Exact and Natural Sciences, University of Warsaw, Zwirki i Wigury 93, 02-089 Warsaw

3 Centre of New Technologies, University of Warsaw, Banacha 2c, 02-097 Warsaw

*****Corresponding author: jkowalska@fuw.edu.pl

**SUPPORTING INFORMATION**

**List of content**

[**Figure S1. IFIT1 expression and purification** 2](#_Toc173250813)

[**Błąd! Nie zdefiniowano zakładki.**](#_Toc173250814)

[**Figure S2. MST curve from the measurements of IFIT1 and RED-tris-NTA dye** 3](#_Toc173250815)

[**Figure S3. Differential Scanning Calorimetry for IFIT1- cap analogs and IFIT1- capped RNA70** 4](#_Toc173250816)

[**Figure S4. Differential Scanning Calorimetry Analysis of IFIT1 with and without N-terminal Histag** 5](#_Toc173250817)

[**Figure S5. MST traces and curves from the measurements of RNA70 ligands and free cap analogs** 10](#_Toc173250819)

**Table S1. Template sequences for measurements optimization** 10

## **Figure S1. IFIT1 expression and purification**

**A)** Polyacrylamide gel (12%) fractions of final hIFIT1 protein preparates; **B)** nucleotide sequence of Interferon-induced protein with tetratricopeptide repeats 1 and comparison of amino acid sequence (NCBI) to the IFIT1 that we used in our studies. Peptides identified with MS were marked in red. The degree of overlap is 0.81.

#

# **Figure S2. Control experiments for the MST assay A) MST curve from the measurements of IFIT1 and RED-tris-NTA dye B) MST traces and curve from the measurements of cap-0 RNA (V5x3) and RED-tris-NTA dye.** A) A dye affinity assay (NanoTemepr) was performed using RED-tris-NTA dye to assess its binding affinity to IFIT1 protein. The dye (10 nM) was titrated with IFIT1 protein following the manufacturer’s recommendations (NanoTemper). The obtained dissociation constant (*K*D) for the protein-dye interaction was 13 nM (C.I. 10 - 17 nM), indicating sufficiently high affinity of the N-terminal Histag-IFIT1 protein for the fluorescent dye ; B) titration of free RED-tris-NTA dye (10 nM) with RNA ligand. B) A dye-RNA affinity assay was performed to exclude nonspecific interactions of a RED-tris-NTA dye with RNA molecules. The dye (10 nM) was titrated with cap0-RNA V5x3 (240 nt) at the highest concentration of 20 µM. As a result, no changes in the thermophoresis profile were observed at any concentration, and neither a curve nor a *K*D value was obtained. This indicates the absence of direct interactions between the dye and the RNA molecules.

# **FigureS3.Differential Scanning Calorimetryfor IFIT1-cap analog and IFIT1-cappedRNA70 complexes** A) The effect of ionic strength on protein stability. Differential Scanning Calorimetry (DSC) for IFIT1 protein(1.5 μM)in 20 mM HEPES buffer with 100 mM NaCl (red) and 200 mM NaCl (blue). B) Effect of pH and detergent contenton protein stability. Differential Scanning Calorimetry (DSC) for IFIT1 protein(1.5 μM)in 20 mM HEPES buffer with100mM NaCl, pH 7.0, 0.05% Tween(violet), 20 mM HEPES buffer with 200 mM NaCl, pH7.0, 0.05% Tween(orange), 20 mM HEPES buffer with100mM NaCl, pH 7.5, 0.05% Tween (pink), 20 mM HEPES buffer with 200mM NaCl, pH7.5, 0.05% Tween (blue), 20 mM HEPES buffer with100mM NaCl, pH7.5, 0.075% Pluronic (green)and 20 mM HEPES buffer with 200 mM NaCl, pH 7.5, 0.075%Pluronic(grey).

#

# **Figure S4. Differential Scanning Calorimetry Analysis of IFIT1 with and without N-terminal Histag –**

# **The impact of IFIT1 interactions with cap-0 and cap-1 RNAs on protein stability.** IFIT1 protein without the N-terminal Histag (TEV protease cleavage) exhibited slightly higher stability compared to IFIT1 with the N-terminal Histag. The IFIT1 complex with cap-0-RNA demonstrated significantly higher stability compared to IFIT1 alone, comparably for samples with and without the N-terminal Histag. For IFIT1 with cap-1-RNA, no improvement in stability was observed compared to the protein alone, regardless of the presence of the N-terminal Histag.

# **Figure S5. MST traces and curves from the measurements of RNA70 ligands and free cap analogs**

A) Merged measurements from the MST binding assay (traces and curves) for IFIT1-cap analog interaction. B) Merged measurements from MST binding assay (traces and curves) for IFIT1-capped RNA70 interaction. Data were processed as described in the experimental section.

**Table S1. Template sequences for measurement optimization**

The oligonucleotide sequences were annealed to prepare DNA templates for the IVT synthesis of capped RNA ligands (underlined transcription start site).

|  | **Oligonucleotide sequence** |
| --- | --- |
| **RNA I** | GTGTAATACGACTCACTATAGGGACATTTGCTTCTGACACAACTGTGTTCACTAGCAA |
| TTGCTAGTGAACACAGTTGTGTCAGAAGCAAATGTCCCTATAGTGAGTCGTATTACAC |
| **RNA II** | GTGTAATACGACTCACTATAGGGAAAAAAAAAAAAAAAACATTTGCTTCTGACACA |
| TGTGTCAGAAGCAAATGTTTTTTTTTTTTTTTTCCCTATAGTGAGTCGTATTACAC |
| **RNA III** | GTGTAATACGACTCACTATAGGGACATTTGCTTCTGACACAACTGTGTTCACTAGCAACCTCAAACAGACACCATGGTGCATCTGACTCCT |
| AGGAGTCAGATGCACCATGGTGTCTGTTTGAGGTTGCTAGTGAACACAGTTGTGTCAGAAGCAAATGTCCCTATAGTGAGTCGTATTACAC |
| **RNA IV** | GTGTAATACGACTCACTATAGGGGTACGCCACCATGGAAGGTAAGCCTATCCCTAACCCTCTCCTCGGTCTCGATTCTACGGGCAGCAGCGGCGGCAAACCGATTCCGAACCCGCTGCTGGGCCTGGATAGCACCGGTAGCAGCGGCGGTAAGCCTATCCCTAACCCTCTCCTCGGTCTCGATTCTACGGTTTAAACAAAAAAAAAAAAAAAAAAAAAAAAAAAAAAAAAAAAAAAAAAAAAAAAAAAAAAAAAAAA |
| TTTTTTTTTTTTTTTTTTTTTTTTTTTTTTTTTTTTTTTTTTTTTTTTTTTTTTTTTTTTGTTTAAACCGTAGAATCGAGACCGAGGAGAGGGTTAGGGATAGGCTTACCGCCGCTGCTA  CCGGTGCTATCCAGGCCCAGCAGCGGGTTCGGAATCGGTTTGCCGCCGCTGCTGCCCGTAGAATCGAGACCGAGGAGAGGGTTAGGGATAGGCTTACCTTCCATGGTGGCGTACCCCTATAGTGAGTCGTATTACAC |
